# Supplementary material for: Molybdenum(ii) complexes with p-substituted BIAN ligands: synthesis, characterization, biological activity and computational study
Source: Royal Society of Chemistry journal article supplement (doi:10.1039/c9dt00469f), 2019-01-01
Supplement: c9dt00469f1.pdf [file c9dt00469f1.pdf]

## Supporting information

for

### Molybdenum(II) complexes with *p*-substituted BIAN ligands: synthesis, characterization, biological activity and computational study

Susana Quintal,<sup>a,b</sup> Maria João Pires da Silva,<sup>a</sup> Soraia R. M. Martins,<sup>a</sup> Rita Sales,<sup>a</sup> Vitor Félix,<sup>c</sup> Michael G. B. Drew,<sup>f</sup> Margarida Meireles,<sup>a</sup> Ana C. Mourato,<sup>a</sup> Carla D. Nunes,<sup>a,d</sup> Marta S. Saraiva,<sup>a,c</sup> Miguel Machuqueiro,<sup>a,c</sup> Maria José Calhorda<sup>a,c\*</sup>

<sup>a</sup> Centro de Química e Bioquímica, DQB, Faculdade de Ciências, Universidade de Lisboa, Campo Grande, 1749-016 Lisboa, Portugal

<sup>b</sup> Departamento de Química Inorgânica, Universidade Federal Fluminense, Campus do Valonguinho, 24020-141 Niterói, RJ, Brazil

<sup>c</sup> BioISI -Biosystems & Integrative Sciences Institute, Departamento de Química e Bioquímica, Faculdade de Ciências, Universidade de Lisboa, Campo Grande, 1749-016 Lisboa, Portugal

<sup>d</sup> Centro de Química Estrutural, Faculdade de Ciências, Universidade de Lisboa, 1049-001 Lisboa, Portugal

<sup>e</sup> Department of Chemistry, CICECO - Aveiro Institute of Materials, University of Aveiro, 3810-193 Aveiro, Portugal

<sup>f</sup> Department of Chemistry, University of Reading, Whiteknights, Reading RG6 6AD, UK

|                  | Title                                                                                                                                                    | Page |
|------------------|----------------------------------------------------------------------------------------------------------------------------------------------------------|------|
| <b>Figure S1</b> | DFT optimized structures of the axial isomer of complex <b>3a</b> with some relevant distances (Å).                                                      | 2    |
| <b>Figure S2</b> | DFT optimized structures of the two isomers of isomer <b>4</b> (axial, top; equatorial, bottom) with some relevant distances (Å).                        | 2    |
| <b>Figure S3</b> | HOMO-1 (top, left), HOMO (top, right) and LUMO (bottom) of complex [Mo( $\eta^3$ -C <sub>3</sub> H <sub>5</sub> )Br(CO) <sub>2</sub> (L2)] ( <b>2</b> ). | 3    |
| <b>Figure S4</b> | HOMO (left) and LUMO (right) of complex [Mo( $\eta^3$ -C <sub>3</sub> H <sub>5</sub> )Br(CO) <sub>2</sub> (L3)] ( <b>3a</b> ).                           | 3    |
| <b>Figure S5</b> | HOMO (left) and LUMO (right) of complex [Mo( $\eta^3$ -C <sub>3</sub> H <sub>5</sub> )Br(CO) <sub>2</sub> (L4)] ( <b>4</b> ).                            | 4    |
| <b>Figure S6</b> | HOMO (left) and LUMO (right) of complex [Mo( $\eta^3$ -C <sub>3</sub> H <sub>5</sub> )Br(CO) <sub>2</sub> (L5)] ( <b>5</b> ).                            | 4    |
| <b>Figure S7</b> | The HOMOs of complexes <b>1</b> , <b>2</b> , <b>3a</b> , <b>4</b> and <b>5</b> .                                                                         | 5    |
| <b>Figure S8</b> | DFT optimized structures of the axial isomers of <b>1</b> and <b>1<sup>+</sup></b> with some relevant distances (Å).                                     | 5    |
| <b>Table S1</b>  | Crystal data and selected refinement details for <b>2</b> and <b>3c</b> .                                                                                | 6    |

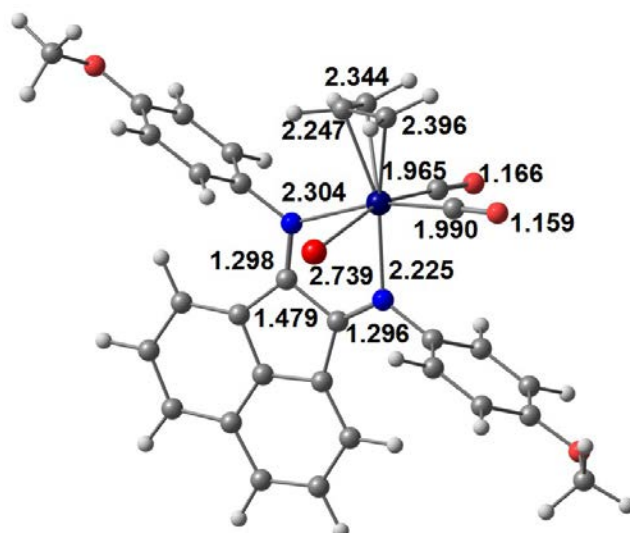

**Figure S1.** DFT optimized structures of the axial isomer of complex **3a** with some relevant distances (Å).

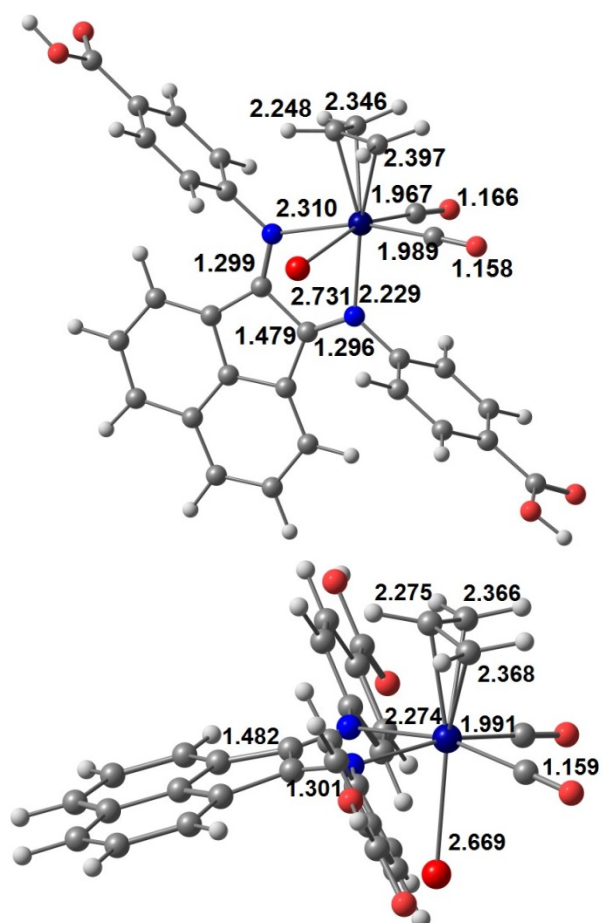

**Figure S2.** DFT optimized structures of the two isomers of isomer **4** (axial, top; equatorial, bottom) with some relevant distances (Å).

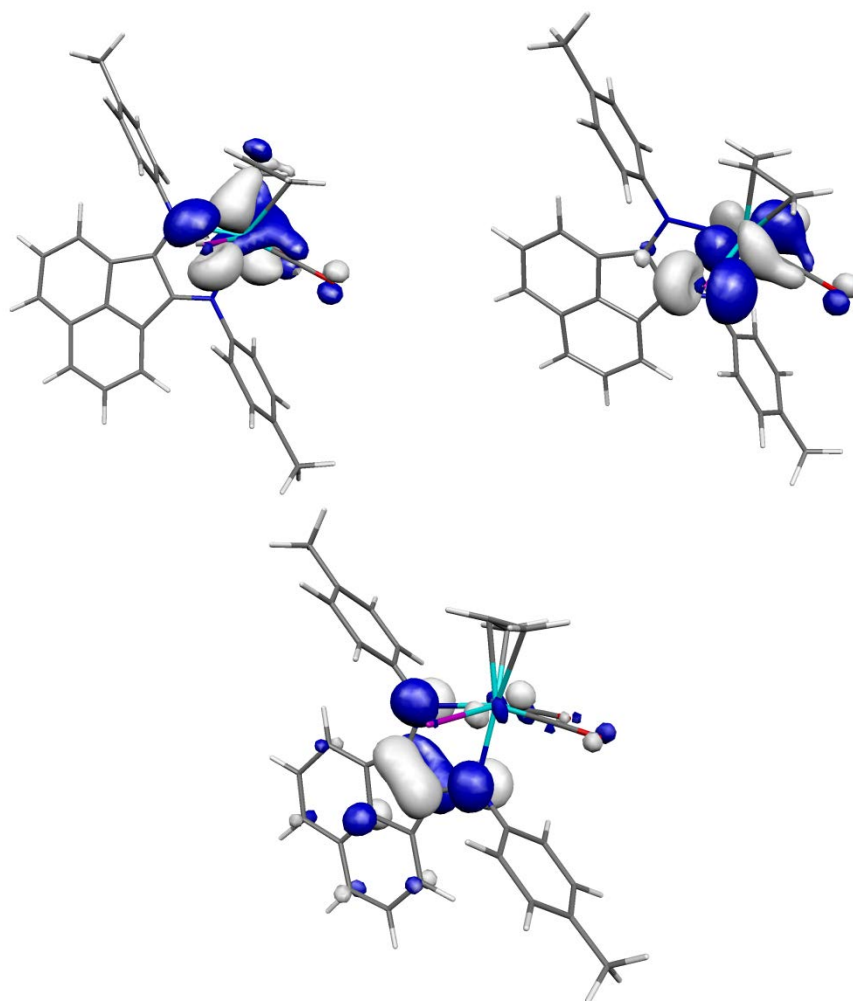

**Figure S3.** HOMO-1 (top, left), HOMO (top, right) and LUMO (bottom) of complex  $[\text{Mo}(\eta^3\text{-C}_3\text{H}_5)\text{Br}(\text{CO})_2(\text{L}2)]$  (**2**).

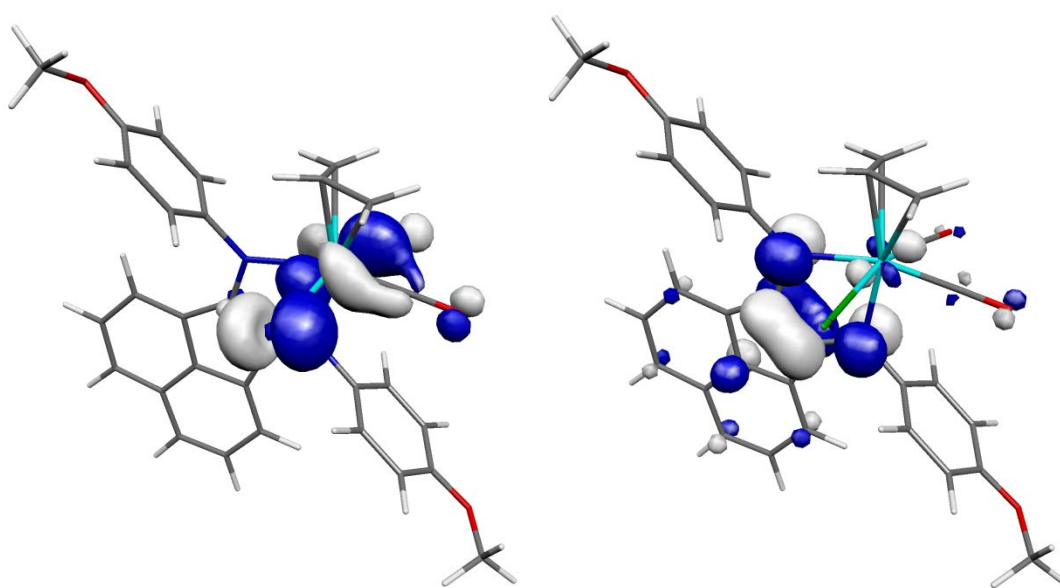

**Figure S4.** HOMO (left) and LUMO (right) of complex  $[\text{Mo}(\eta^3\text{-C}_3\text{H}_5)\text{Br}(\text{CO})_2(\text{L}3)]$  (**3a**).

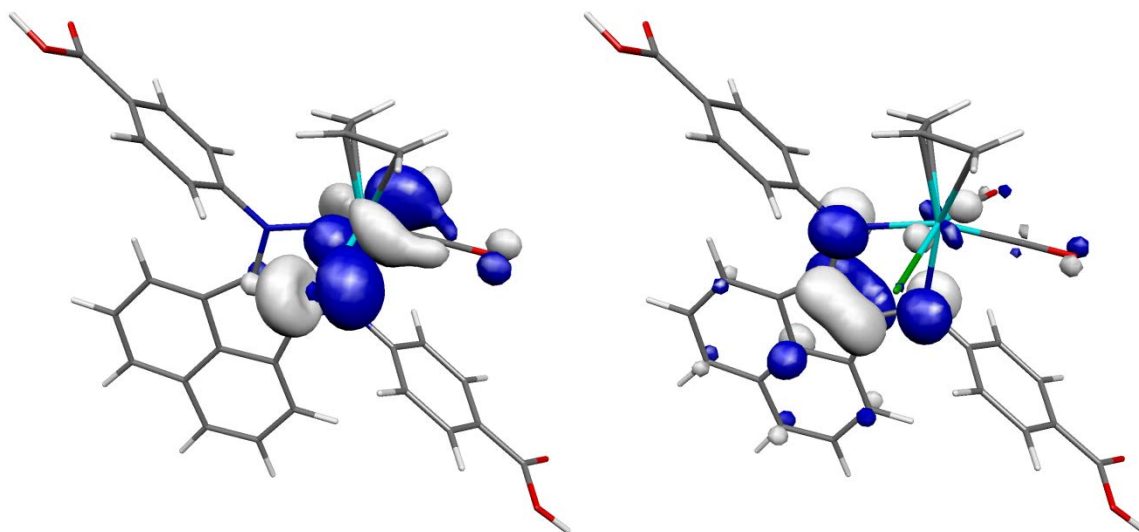

**Figure S5.** HOMO (left) and LUMO (right) of complex  $[\text{Mo}(\eta^3\text{-C}_3\text{H}_5)\text{Br}(\text{CO})_2(\text{L4})]$  (4).

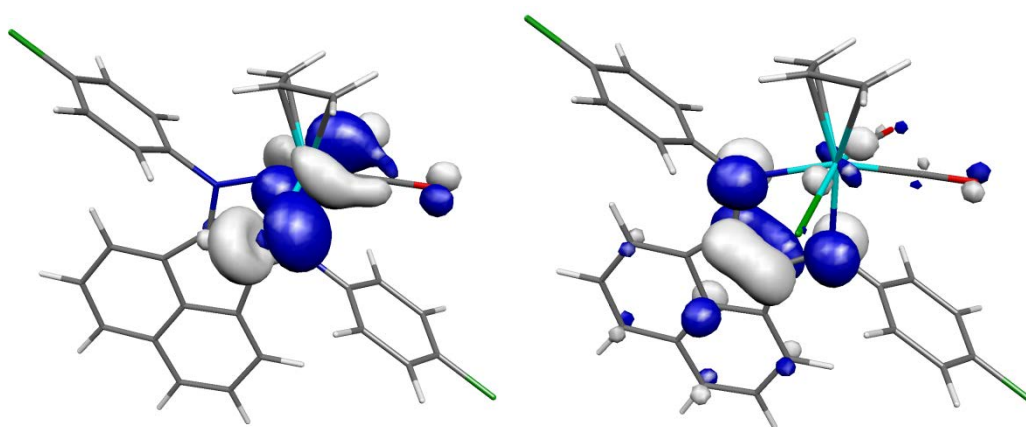

**Figure S6.** HOMO (left) and LUMO (right) of complex  $[\text{Mo}(\eta^3\text{-C}_3\text{H}_5)\text{Br}(\text{CO})_2(\text{L5})]$  (5).

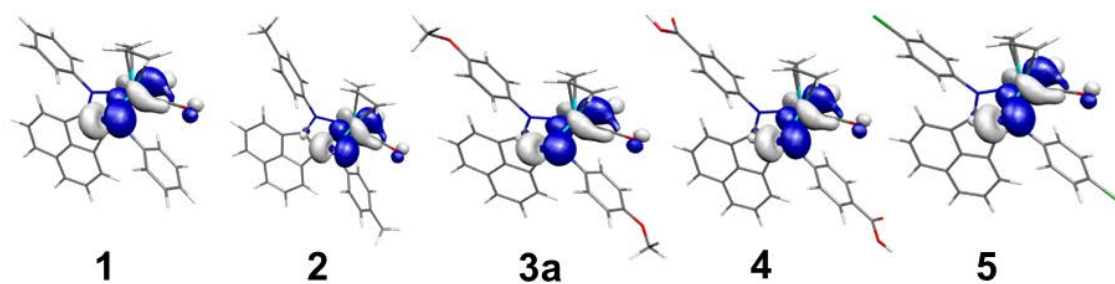

**Figure S7.** The HOMOs of complexes **1**, **2**, **3a**, **4** and **5**.

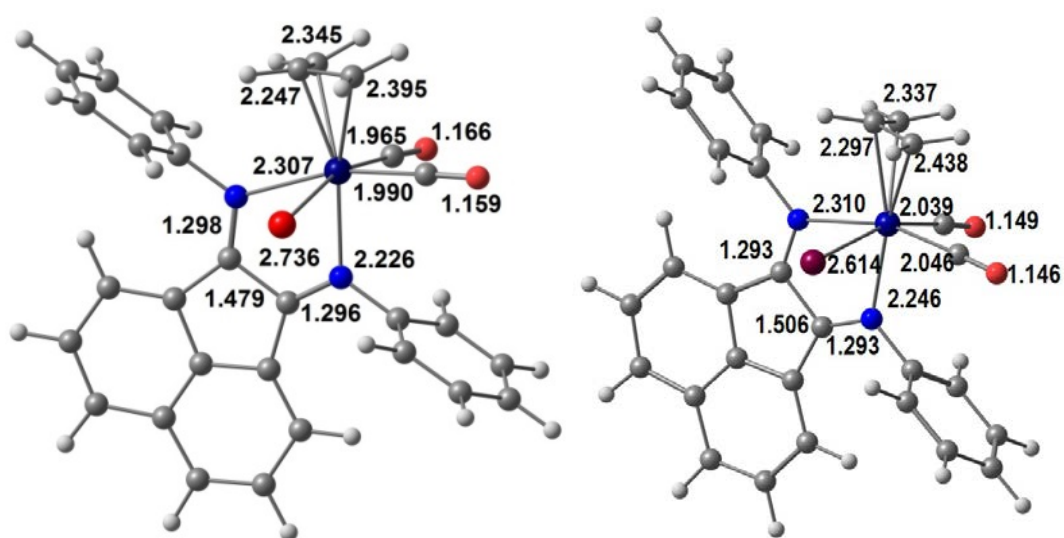

**Figure S8.** DFT optimized structures of the axial isomers of **1** and **1<sup>+</sup>** with some relevant distances (Å).

**Table S1.** Crystal data and selected refinement details for **2** and **3c**.

| Compound                                                                     | <b>2</b>                                                           | <b>3c</b>                                                                        |
|------------------------------------------------------------------------------|--------------------------------------------------------------------|----------------------------------------------------------------------------------|
| Empirical formula                                                            | C <sub>31</sub> H <sub>25</sub> N <sub>2</sub> O <sub>2</sub> BrMo | C <sub>34</sub> H <sub>28</sub> F <sub>3</sub> MoN <sub>3</sub> O <sub>7</sub> S |
| Formula weight                                                               | 633.38                                                             | 775.59                                                                           |
| Temperature                                                                  | 150(2)                                                             | 293(2)                                                                           |
| Crystal system                                                               | Triclinic                                                          | Triclinic                                                                        |
| Space group                                                                  | $P\bar{1}$                                                         | $P\bar{1}$                                                                       |
| <i>a</i> /Å                                                                  | 10.2544(17)                                                        | 9.9182(6)                                                                        |
| <i>b</i> /Å                                                                  | 11.748(2)                                                          | 13.4256(8)                                                                       |
| <i>c</i> /Å                                                                  | 12.826(2)                                                          | 14.5907(8)                                                                       |
| $\alpha$ /°                                                                  | 78.519(9)                                                          | 66.621(6)                                                                        |
| $\beta$ /°                                                                   | 68.136(8)                                                          | 71.534(5)                                                                        |
| $\gamma$ /°                                                                  | 68.329(8)                                                          | 72.517(5)                                                                        |
| Volume/Å <sup>3</sup>                                                        | 1329.24(4)                                                         | 1657.12(19)                                                                      |
| Z                                                                            | 2                                                                  | 2                                                                                |
| $\rho_{\text{calc}}/\text{cm}^3$                                             | 1.582                                                              | 1.554                                                                            |
| $\mu/\text{mm}^{-1}$                                                         | 2.028                                                              | 0.529                                                                            |
| <i>F</i> (000)                                                               | 636.0                                                              | 788.0                                                                            |
| 2 $\theta$ range for data collection/°                                       | 6.516 to 49.998                                                    | 5.306 to 49.996                                                                  |
| Index ranges                                                                 | -11 ≤ <i>h</i> ≤ 12, -13 ≤ <i>k</i> ≤ 13, -15 ≤ <i>l</i> ≤ 15      | -11 ≤ <i>h</i> ≤ 9, -15 ≤ <i>k</i> ≤ 10, -17 ≤ <i>l</i> ≤ 14                     |
| Reflections collected                                                        | 12965                                                              | 8078                                                                             |
| Independent reflections, <i>R</i> <sub>int</sub> , <i>R</i> <sub>sigma</sub> | 4601, 0.0194, 0.0228                                               | 5726, 0.0134, 0.0183                                                             |
| Data/restraints/parameters                                                   | 4601/12/379                                                        | 5726/60/533                                                                      |
| Goodness-of-fit on <i>F</i> <sup>2</sup>                                     | 1.036                                                              | 1.060                                                                            |
| Final <i>R</i> indexes [ <i>I</i> ≥ 2 $\sigma$ ( <i>I</i> )]                 |                                                                    |                                                                                  |
| <i>R</i> <sub>1</sub> , <i>wR</i> <sub>2</sub>                               | 0.0203, 0.0512                                                     | 0.0248, 0.0605                                                                   |
| Final <i>R</i> indexes [all data]                                            |                                                                    |                                                                                  |
| <i>R</i> <sub>1</sub> , <i>wR</i> <sub>2</sub>                               | 0.0245, 0.0529                                                     | 0.0278, 0.0616                                                                   |
| Largest diff. peak/hole / eÅ <sup>-3</sup>                                   | 0.30/-0.34                                                         | 0.36/-0.28                                                                       |
